# Supplementary material for: The transient expression of miR-203 and its inhibiting effects on skeletal muscle cell proliferation and differentiation
Source: PubMed Central journal article supplement (PMC4123083; doi:10.1038/cddis.2014.289), 2014-07-17
Supplement: cddis2014289x1.pdf [file cddis2014289x1.pdf]

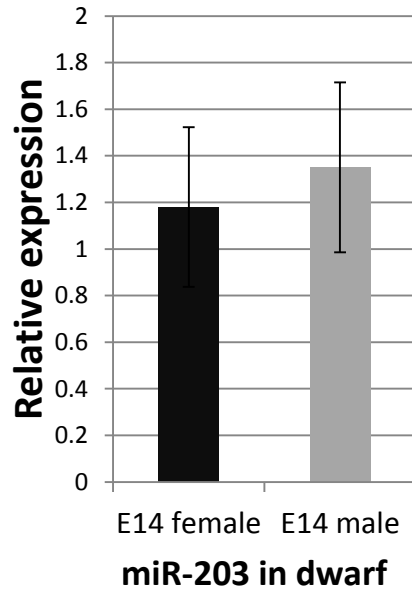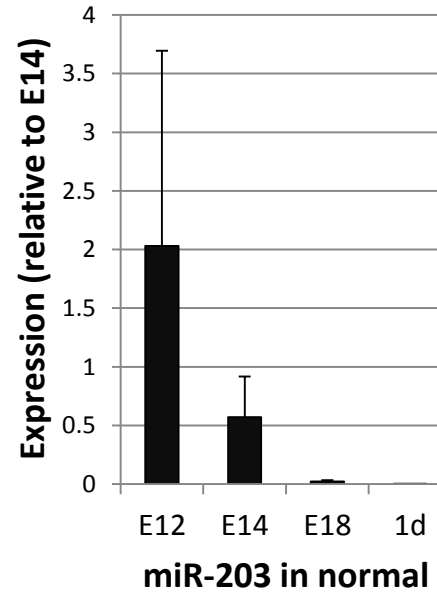

**Supplementary file 1. miR-203 expression in normal chicken leg muscles, and in different sex of dwarf chickens leg muscles.**

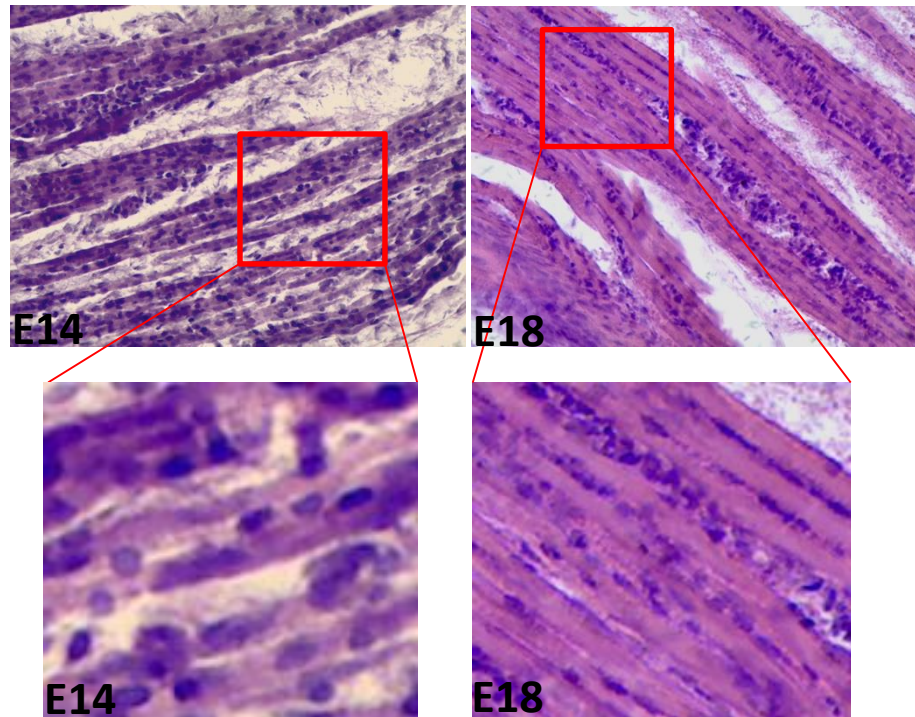

**Supplementary file 2.** H-E staining of leg muscle fiber vertical section of E14 and E18 dwarf chicken.

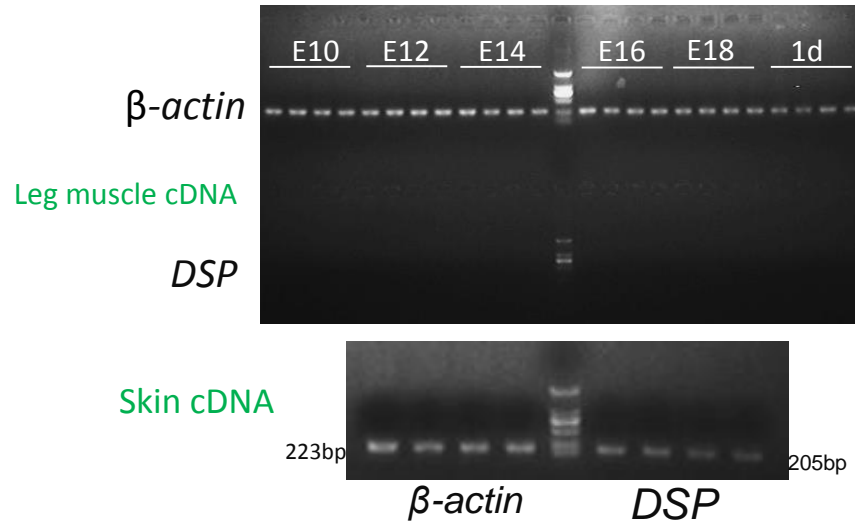

**Supplementary file 3.** RT-PCR validation that skin-specific gene *DSP* is not expressed in embryonic skeletal muscle samples.  $\beta$ -actin was used as the reference gene, skin cDNAs were used as reference samples.

## miR-203

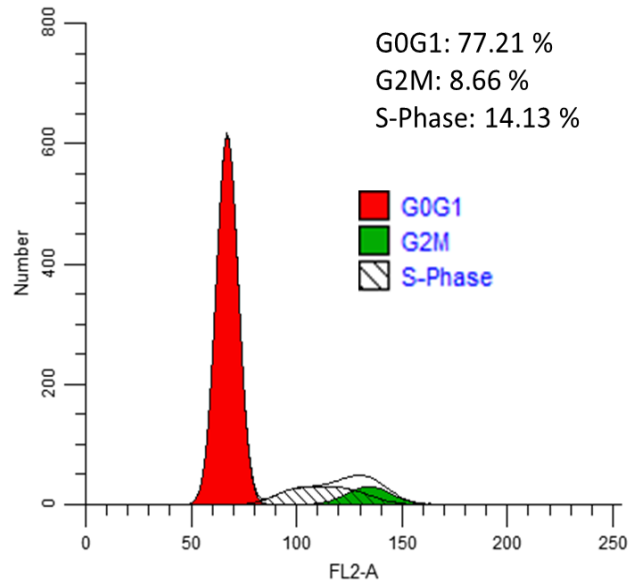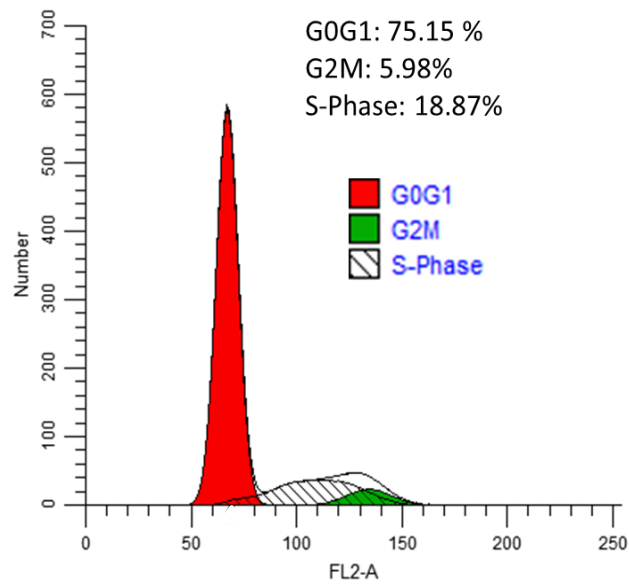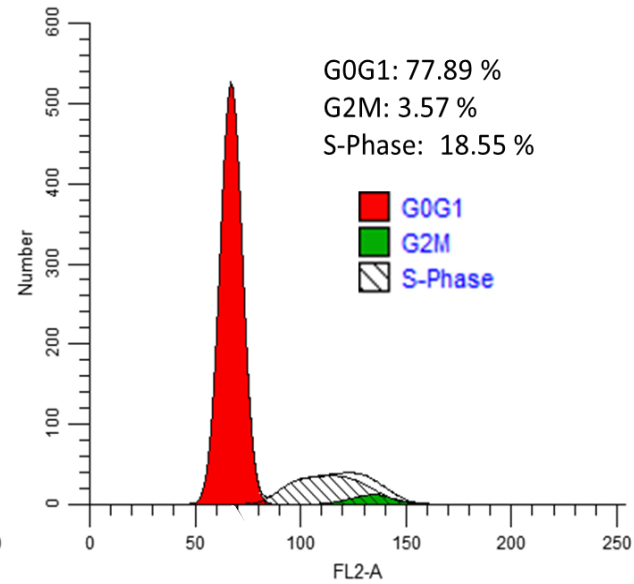

## control

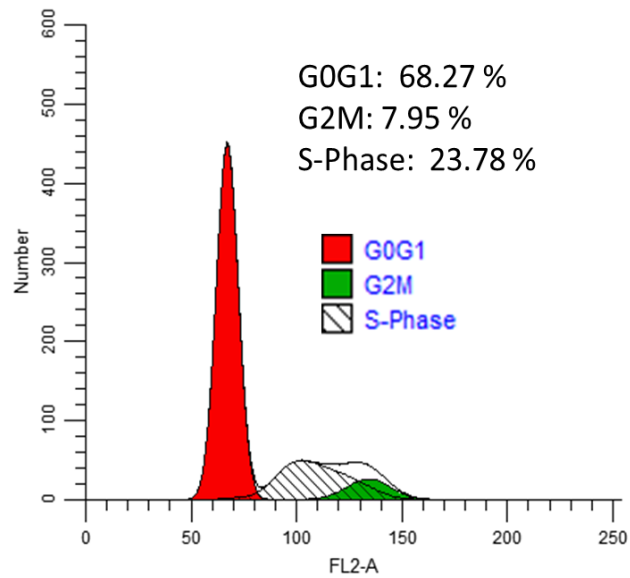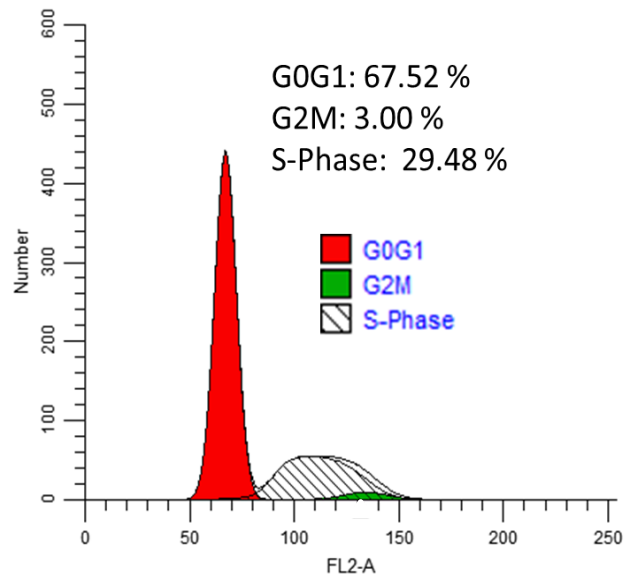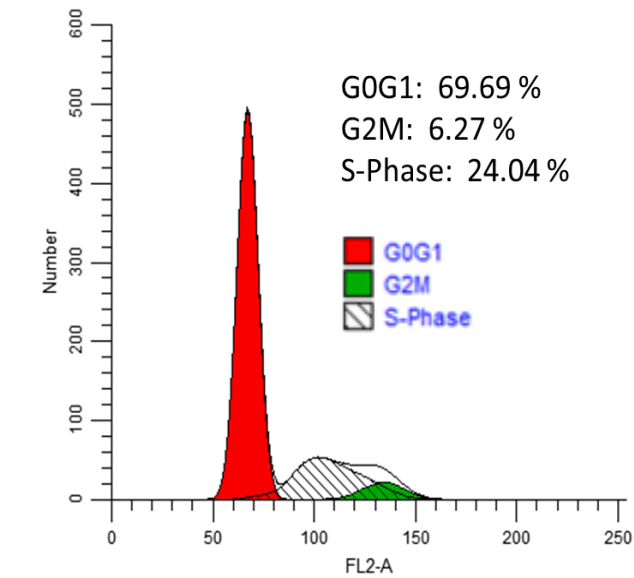

## Anti-miR-203

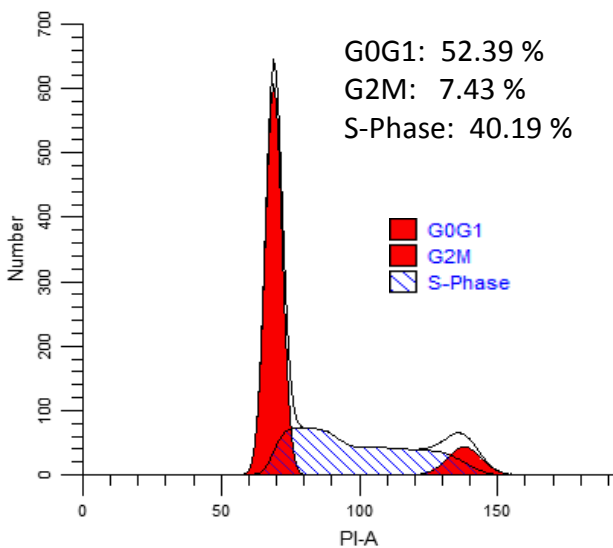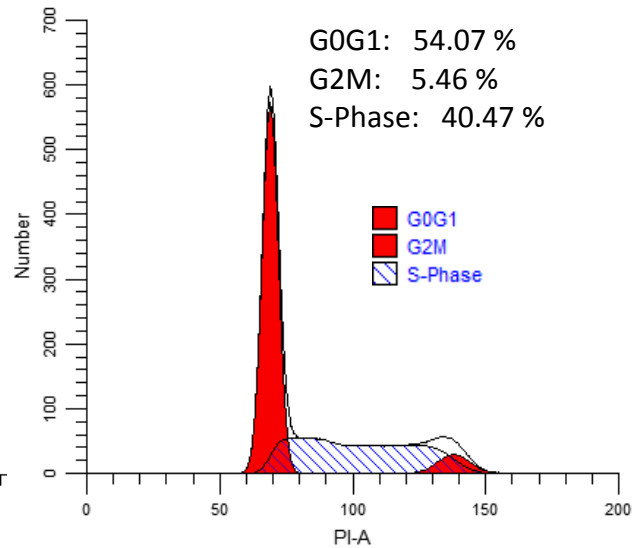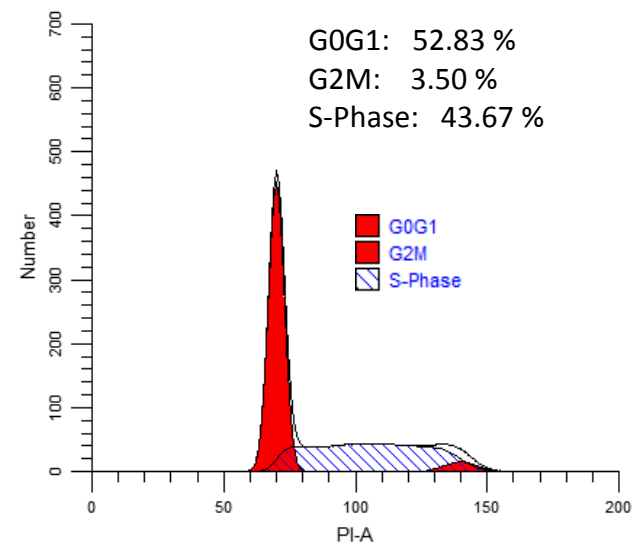

## Anti-NC

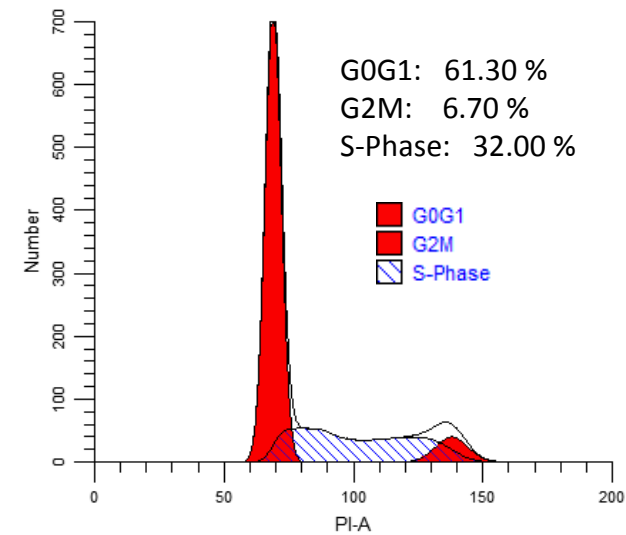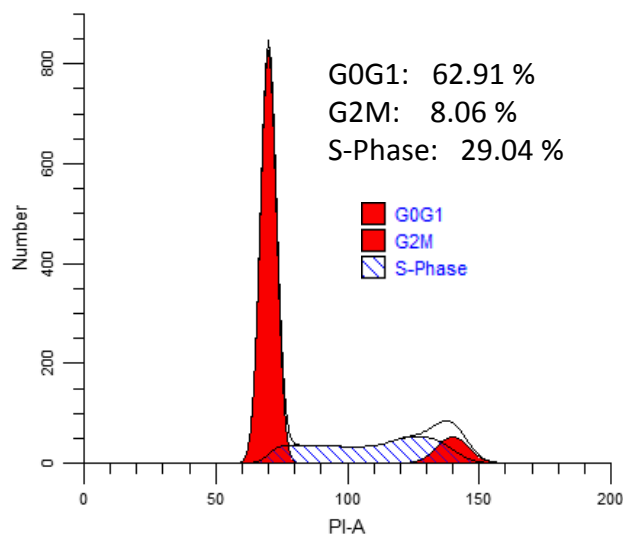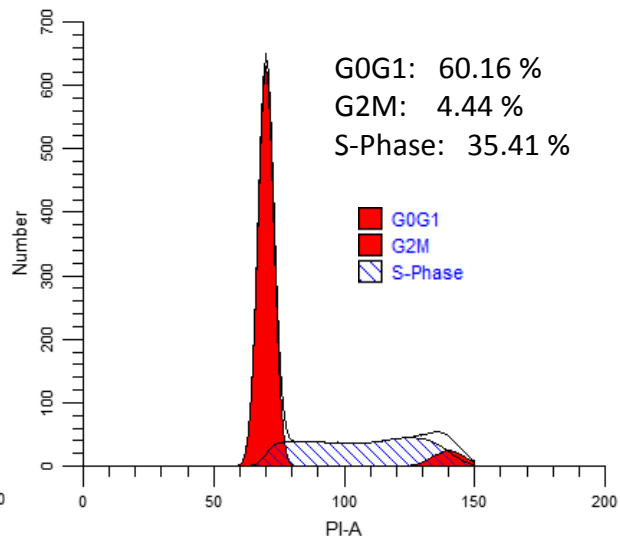

## pcDNA3.1-c-JUN

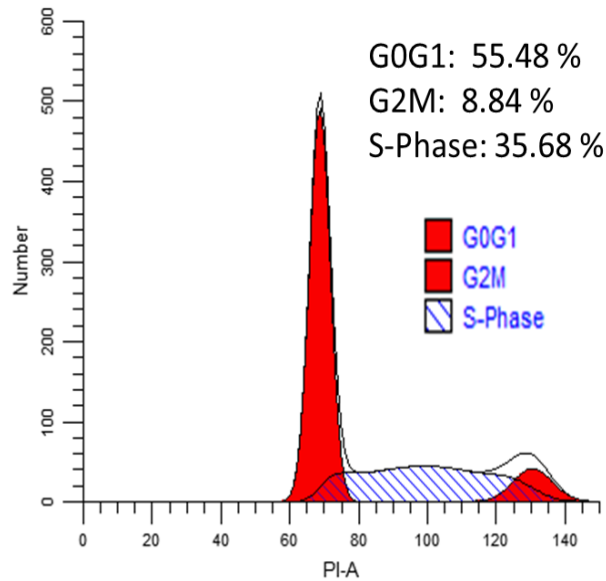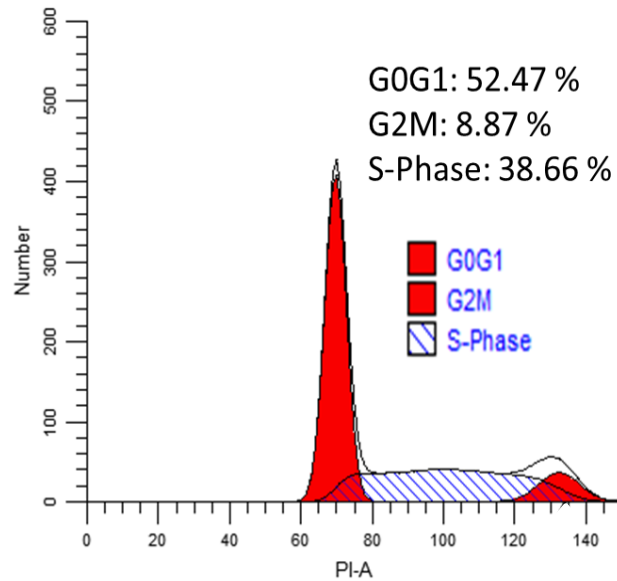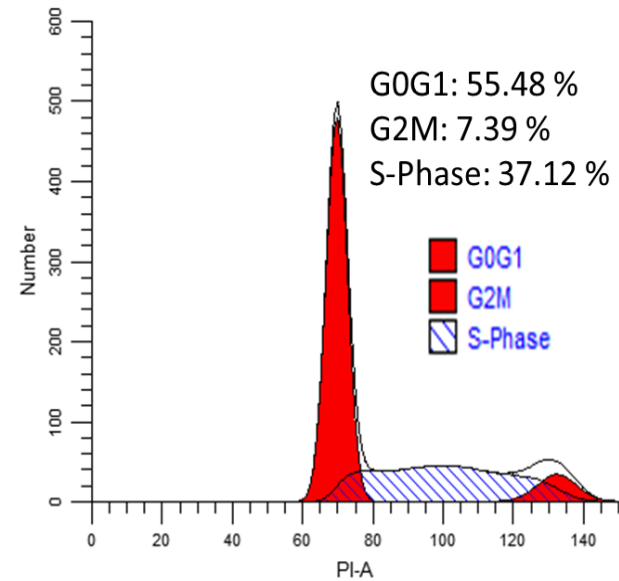

## pcDNA3.1

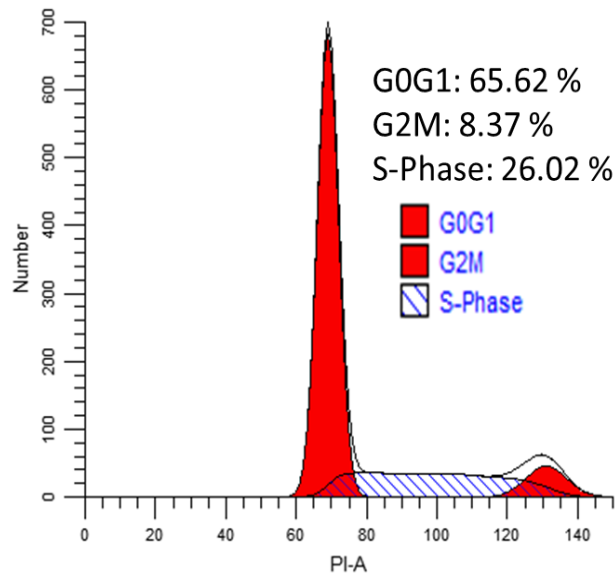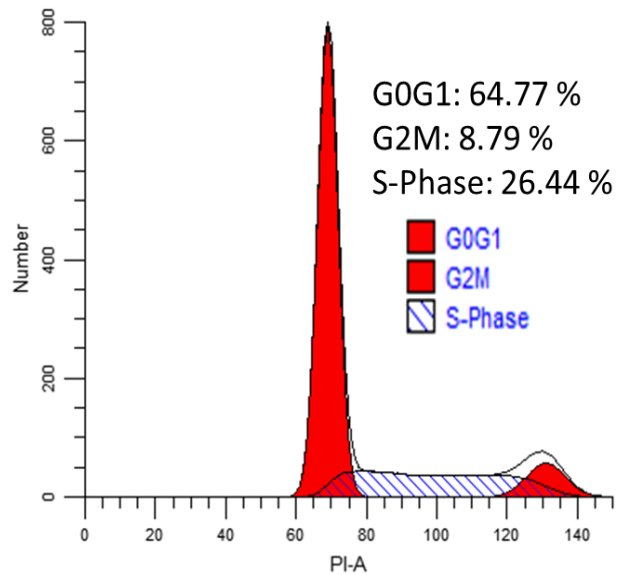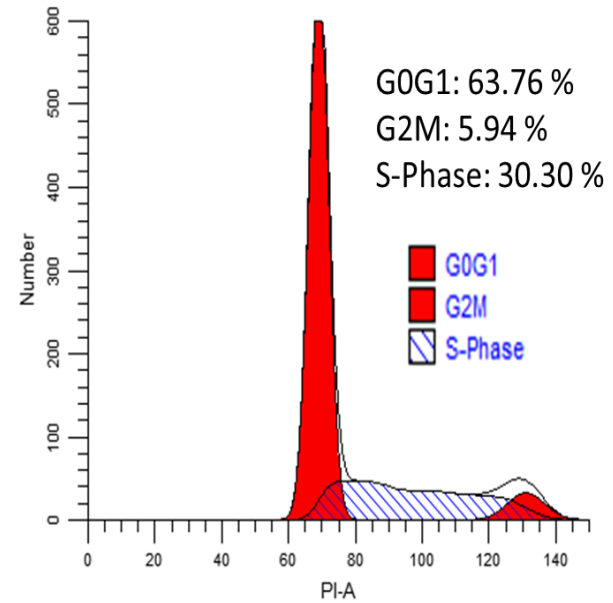

## si-c-JUN

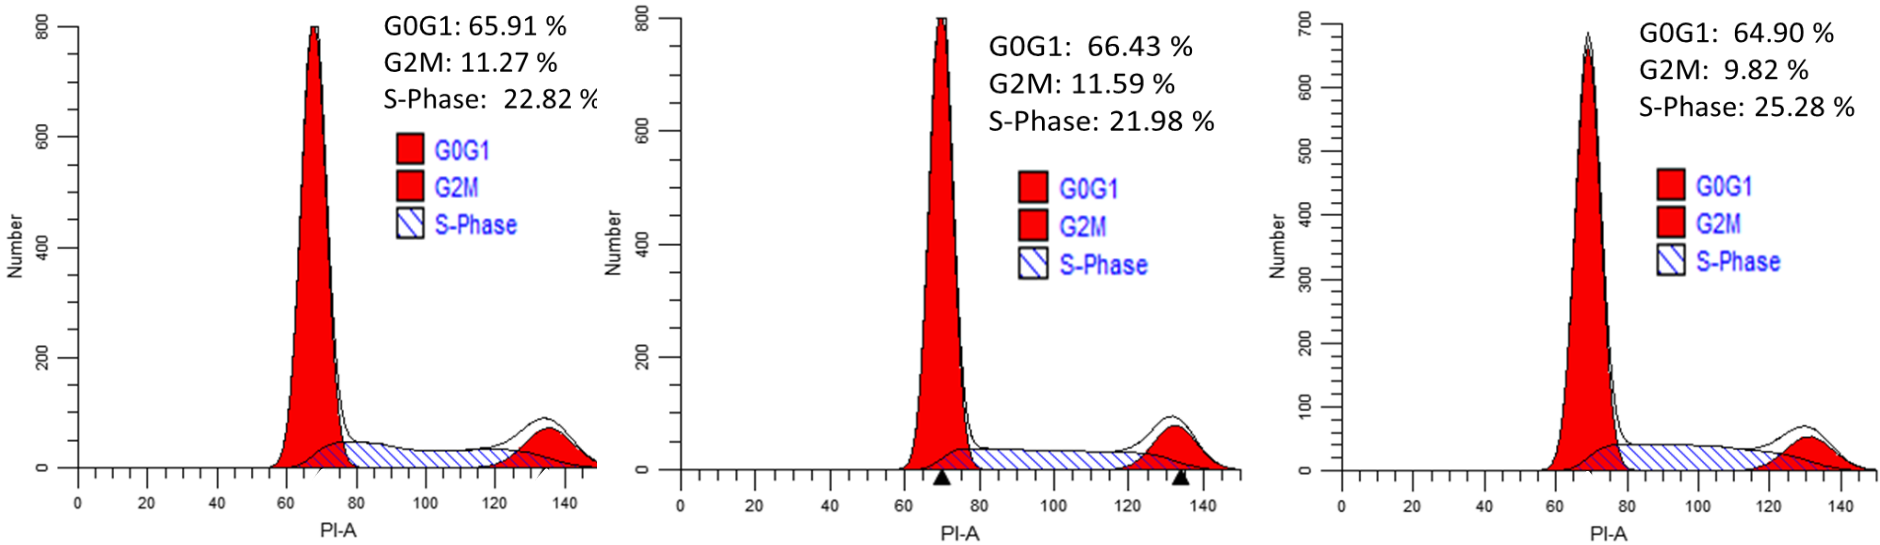

## si-NC

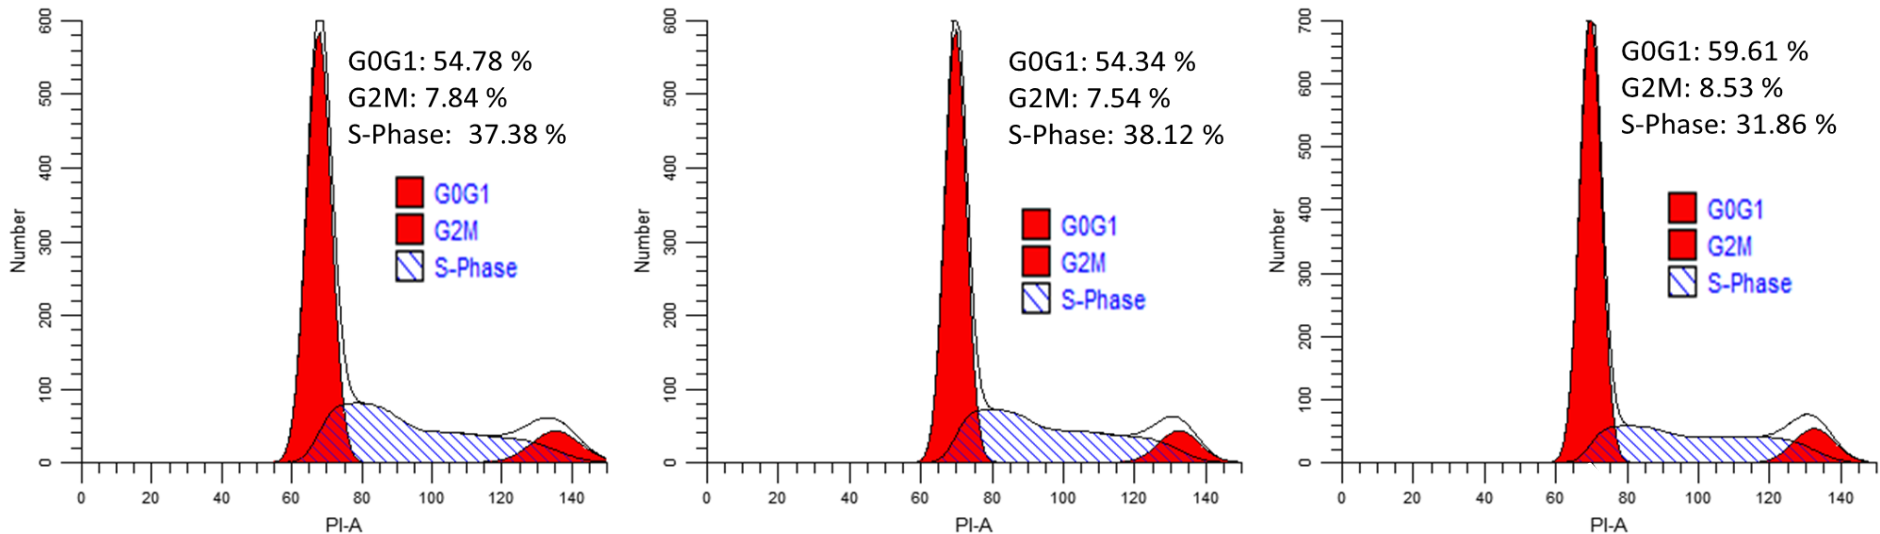

Supplementary file 7. The histograms of cell cycle analyzed by flow cytometry

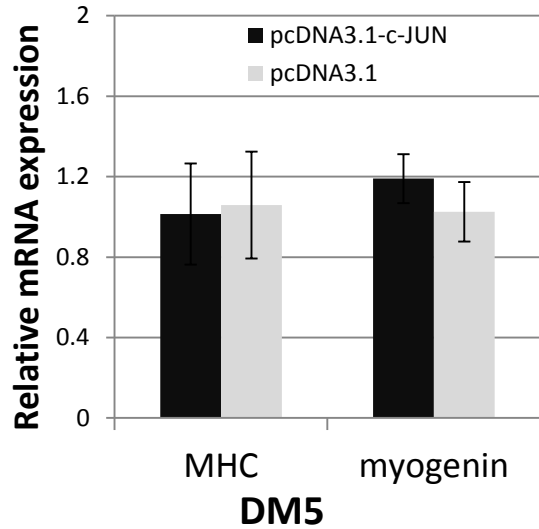

**Supplementary file 8.** Overexpression of *c-JUN* has no effect on the mRNA expression of *MHC* and *myogenin*.

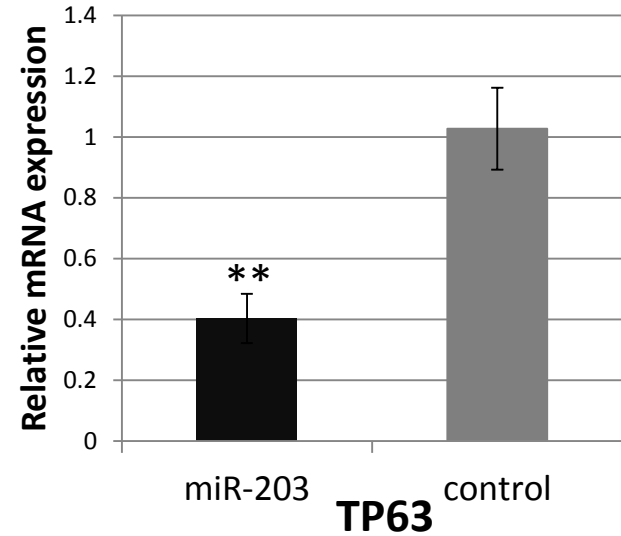

**Supplementary file 9.** miR-203 overexpression significantly inhibit *TP63* mRNA expression.
